# Experimental and computational evaluation of knee implant wear and creep under in vivo and ISO boundary conditions

<sup>1,2</sup>Michael J. Dreyer, <sup>1</sup>Seyyed Hamed Hosseini Nasab, <sup>3</sup>Philippe Favre, <sup>3</sup>Fabian Amstad,  
<sup>4</sup>Rowena Crockett, <sup>1</sup>William R. Taylor, <sup>2</sup>Bernhard Weisse

5

<sup>1</sup> Laboratory for Movement Biomechanics, Institute for Biomechanics, ETH Zürich, Switzerland

<sup>2</sup> Laboratory for Mechanical Systems Engineering, Empa, Dübendorf, Switzerland

<sup>3</sup> Zimmer Biomet, Zug, Switzerland

<sup>4</sup> Laboratory for Surface Science and Coating Technologies, Empa, Dübendorf, Switzerland

10

**Keywords:** Implant; knee; wear; creep; model; simulation;

**Corresponding Author:**

Prof. Dr. William R. Taylor

Laboratory for Movement Biomechanics

15 Institute for Biomechanics

ETH Zürich

Leopold-Ruzicka-Weg 4

8093 Zürich

Switzerland

20 Email: [bt@ethz.ch](mailto:bt@ethz.ch)

## Abstract

Experimental knee implant wear testing according to ISO 14243 is a standard procedure, but it inherently possesses limitations for preclinical evaluations due to extended testing periods and costly infrastructure. In an effort to overcome these limitations, we hereby develop and experimentally validate a finite element (FE) based algorithm, including a novel cross-shear and contact pressure dependent wear and creep model, and apply it towards understanding the sensitivity of wear outcomes to the applied boundary conditions.

Specifically, we investigated the application of in vivo data for level walking from the publicly available “Stan” dataset, which contains single representative tibiofemoral loads and kinematics derived from in vivo measurements of six subjects, and compared wear outcomes against those obtained using the ISO standard boundary conditions. To provide validation of the numerical models, this comparison was reproduced experimentally on a six-station knee wear simulator over 5 million cycles, testing the same implant Stan’s data was obtained from.

Experimental implementation of Stan’s boundary conditions in displacement control resulted in approximately three times higher wear rates (4.4 vs. 1.6 mm<sup>3</sup> per million cycles) and a more anterior wear pattern compared to the ISO standard in force control. While a force-controlled ISO FE model was unable to reproduce the bench test kinematics, and thus wear rate, displacement-controlled FE models accurately predicted the laboratory wear tests for both ISO and Stan boundary conditions. The credibility of the in silico wear and creep model was further established per the ASME V&V-40 standard. The model is thus suitable for supporting future patient specific models and development of novel implant designs.

## 1. Introduction

45 Longevity of knee implants is a major concern for the two thirds of total knee arthroplasty (TKA) patients who are less than 65 years old (Kurtz et al., 2009). Today, long term failure of knee implants due to wear of the polyethylene (PE) inlay (Kim et al., 2014) or related to aseptic loosening (Oparaugo et al., 2001; Pitta et al., 2018) still occurs, despite improvements in implant designs and material such as PE crosslinking. Efforts to comprehensively investigate and increase the long-term wear resistance of knee implants, however, are somewhat constrained by limited accessibility and viability of current preclinical wear testing methods.

50 Knee implant wear is typically evaluated by means of laboratory wear tests. However, experimental wear testing is extremely time-consuming and costly: A test running for five million cycles at 1 Hz takes approximately four months to complete (Haider, 2009). Thus, experimental implant wear testing is not a practicable tool to compare more than a few conditions or designs at a time. Moreover, variability in the outcome wear measures can be considerable and repeatability may be challenging to achieve (Abdelgaied et al., 2011).

To provide a viable alternative, computational wear simulations, mostly based on deformable finite element (FE) models, have been developed (Abdelgaied et al., 2018; Fregly et al., 2005; Mell et al., 2018). Such computational models have proven to strongly complement experimental testing by being orders of magnitude faster and not requiring dedicated personnel and infrastructure (Taylor and Prendergast, 2015). This allows evaluating the influence of parameters such as implant design, implant positioning, or loading conditions on wear, each taken individually or simultaneously in probabilistic studies (Pal et al., 2008). However, for such models to be useful, their credibility must first be established (Viceconti et al., 2009).

65 When mechanical and in silico wear simulations aim to predict in vivo wear, applied loads and kinematics should be representative of in vivo conditions. While such data has historically been scarce, in vivo implant loads and kinematics have now been made publicly available as part of the CAMS-Knee dataset (Taylor et al., 2017). More recently, the data from the 6 CAMS-Knee subjects were standardized into the single averaged "Stan" dataset, and thus made accessible for mechanical wear simulation (Dreyer et al., 2022b). Interestingly, the commonly used ISO 14243-1 standard loads and kinematics (ISO, 2009), which were calculated from simplified models, were shown to differ from the Stan loads and kinematics measured in vivo for level walking.

75 In this exploratory study, we firstly aimed to develop and validate an advanced computational wear and creep model for predictions of how patient- and implant-specific factors impact PE inlay wear. To this end, a cross-shear and contact-pressure dependent wear model was combined with a novel creep prediction method. The necessary input material data was obtained from fully independent experimental studies. Secondly, the first comparison of wear resulting from the application of Stan's loads and kinematics to wear induced from the ISO standard boundary conditions (BCs) was performed using both computational simulation and experimental testing of wear.

## 2. Methods

### 80 Wear test

Related to the first aim of the study, the main purpose of the experimental wear test was to validate the computational wear and creep model (see below). Additionally, it served to compare the effect of the two different BCs on wear for the second aim of this study. For consistency, all experiments and computational simulations were performed on the same ultra-congruent cruciate-sacrificing TKA implant (Innex<sup>®</sup> FIXUC, Zimmer Biomet, Switzerland), which was also implanted in the patients involved in the CAMS-Knee and Stan investigations.

Implant components were tested on a six-station knee simulator (AMTI, Watertown, USA), which allowed control of femoral flexion angle and anterior-posterior (AP) force or translation, as well as tibial axial force and internal-external (IE) moment or rotation (Figure 1). The tibial component was fixed to have a posterior slope of 6° according to the manufacturer’s surgical technique.

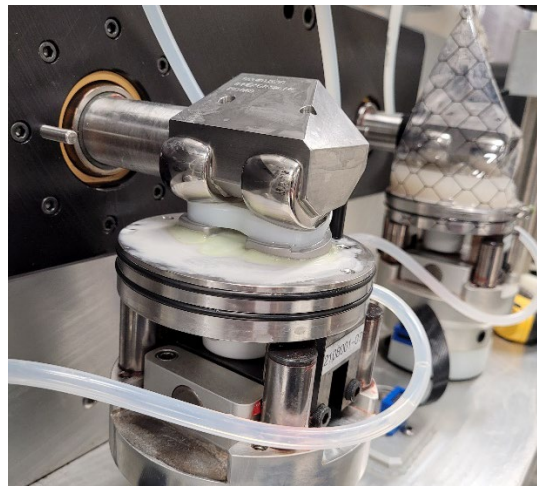

Figure 1. Wear test specimens consisting of PE inlay, tibial, and femoral components fixed in the bench test setup in dry (foreground) and sealed with lubricant (background) state.

The test lubricant was bovine calf serum (Hyclone™ Calf Serum, Cytvia, USA) diluted to a protein concentration of 20 g/L (ISO 12443-1, ISO, 2009). Additionally, 7.4 g/L ethylenediaminetetraacetic acid disodium salt dihydrate (Fisher Scientific, USA) and 2.0 g/L sodium azide (Fisher Scientific, USA) were added to hinder bacterial growth and build-up of calcium phosphate on the implant surfaces according to ASTM F732 – 17 (ASTM International, 2017a). The specimens were pre-soaked in this lubricant for 12 weeks prior to testing.

In the bench test setup (Figure 1), the ISO BCs as well as Stan’s kinematics for level walking and the associated CAMS-HIGH100 loads (Dreyer et al., 2022b) were applied to the implants (Table 1). Stan’s data were applied in displacement-control (DC) to closely reproduce the in vivo contact mechanics in the bench test and models. For consistency, Stan’s conditions would ideally have been compared to the DC ISO 14243-3:2014 standard. However, preliminary FE simulation of the DC ISO standard showed excessive posterior edge loading, also observed in other studies (Abdelgaied et al., 2022; Zhang et al., 2019), which led to dislocation of the implant. Therefore, the force-controlled (FC) ISO 14243-1:2009 standard was used as a comparison for Stan’s loads and kinematics.

One group of three specimens was subjected to the ISO FC BCs and one group of three specimens was subjected to Stan’s kinematics in DC mode ( $ISO_{FC,exp,nom}$  and  $Stan_{DC,exp,nom}$  in Table 1, respectively). The ISO AP force, IE moment, and flexion angle were applied as per the FC standard (ISO 12443-1, ISO, 2009). Stan’s CAMS-HIGH100 loads and kinematics were transformed to the ISO coordinate system and AP and IE kinematics (DC mode) and axial force were applied consistent with the DC ISO standard (ISO 12443-3, ISO, 2014). For each group, two additional soak-control specimens were submerged in lubricant and subjected to the same axial load profile as the wear specimens, but without any other loads or motion, to correct for PE weight changes due to fluid uptake.

Table 1. Overview of experimental and modelling boundary conditions. Note that flexion angle and axial force are driven in displacement and force control, respectively, for all tests regardless of the stated control mode, for consistency with ISO standards.

| Name<br>(BC <sub>mode,type,input</sub> ) | Condition                      | Control mode       | Description of type and input                      | Range of input tibial load/kinematics values                        |
|------------------------------------------|--------------------------------|--------------------|----------------------------------------------------|---------------------------------------------------------------------|
| ISO <sub>FC,exp,nom</sub>                | ISO 14234-1<br>(2009)          | Force (FC)         | Bench test with nominal inputs                     | Flexion angle: 0 to 58°<br>Axial force: 168 to 2600 N               |
| ISO <sub>FC,mod,nom</sub>                |                                |                    | FE model with nominal inputs                       | Anterior force: -110 to 265 N<br>Internal moment: -6 to 1 Nm        |
| ISO <sub>DC,mod,meas</sub>               |                                | Stan level walking | Displacement (DC)                                  | FE model with bench test measured loads/kinematics                  |
| Stan <sub>DC,exp,nom</sub>               | Bench test with nominal inputs |                    |                                                    | Flexion angle: -2° to 48°<br>Axial force: 245 to 3187 N             |
| Stan <sub>DC,mod,nom</sub>               | FE model with nominal inputs   |                    |                                                    | Anterior motion: -5.1 to 0.7 mm<br>Internal rotation: -0.1° to 4.0° |
| Stan <sub>DC,mod,meas</sub>              |                                |                    | FE model with bench test measured loads/kinematics | See Stan <sub>DC,exp,nom</sub> in Figure 4                          |

120

The test was performed at 1.1Hz for 5 million cycles (MC). Wear was measured gravimetrically at 500'000 cycles and afterwards at every full MC until test completion. Subsequently, the volumetric wear rate of each PE inlay was calculated from the slope of the regression line fitted to the wear volume over number of cycles, assuming a PE density of 0.935 g/cm<sup>3</sup> (Saikko, 2017). The effective loads and kinematics applied by the testing machine to the implants were recorded every 20'000 cycles to allow the average applied loads and kinematics to be calculated.

125

Before and after the test, the three-dimensional inlay geometry was measured using a structured light 3D scanner (Pro S3, HP Inc., USA) with a resolution of ~50 µm. The untested and tested 3D geometries of each specimen were aligned using an iterative closest point algorithm and the change in surface geometry due to wear and creep was plotted using custom Python scripts.

130

### Finite element model

Finite element (FE) models of the experimental test setup (Figure 2) were created in Abaqus/Standard 6.21 (Dassault Systèmes, USA). These models consisted of the PE inlay and the femoral component, with tibio-femoral contact defined by a coefficient of friction of 0.04 (Godest et al., 2002). The tibial component was not modelled, as the predicted backside wear on the fixed inlay would be minimal (O'Brien et al., 2013). To enable faster convergence, automatic tangential contact damping was activated, but scaled down by a factor of 0.0001 after confirming a negligible impact on model outputs. The inlay was assigned elastic-plastic material properties calibrated by the manufacturer to material characterization tests on the PE used in the Innex implant. Element size was chosen based on a convergence study on contact pressure and wear, reaching a change in output <2% between two successive mesh refinements. The inlay was assigned a general element size of 2.5 mm, with 0.9 mm elements on the contact surfaces, resulting in 41'833 quadratic tetrahedral elements. The femoral component was modelled as a rigid shell (Carr and Goswami, 2009) with an element size of 0.5 mm on the contact surfaces and approximately 2 mm on the sides, for a total 22'764 linear quadrilateral and triangular elements. The testing machine's fixtures were represented by rigid connector elements (Figure 2) to which the Stan and ISO input loads and kinematics were then applied, resulting in the ISO<sub>FC,mod,nom</sub> and Stan<sub>DC,mod,nom</sub> models (Table 1). Each boundary condition motion cycle was split into

135

140

145

200 time intervals, based on a temporal convergence study considering volumetric wear, leading to a difference of <0.2% between two interval sizes.

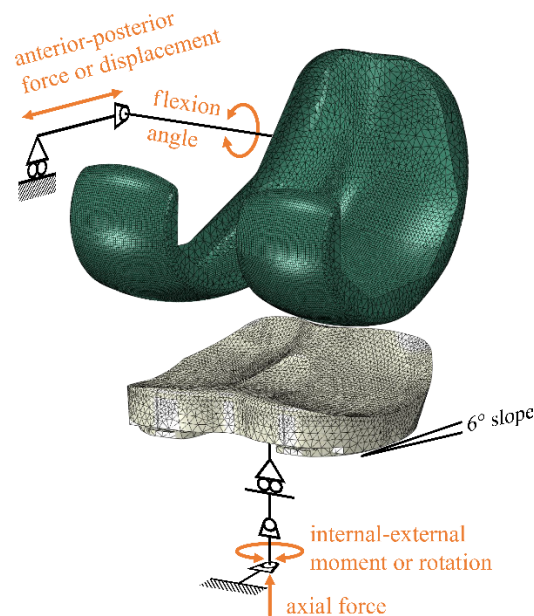

150

Figure 2. Exploded view of the finite-element model, consisting of the inlay (beige) and femoral (green) components and the rigid connector elements representing the wear simulator fixtures.

For the same input loads or kinematics, slightly different resultant contact loads and kinematics could be expected between the knee simulator, which is affected by inertia, tolerances, and control system delays, and the FE model, which is affected by simplifications and idealized component geometries. This is especially the case for FC mode, where deviations of several millimetres and degrees commonly occur (Abdelgaied et al., 2022; Bauer et al., 2021; Knight et al., 2007). To evaluate the influence of these different contact mechanics on wear and creep prediction, two additional simulations were run. Specifically, the average kinematics and axial forces of the ISO and Stan groups measured on the testing machine were applied to the corresponding FE models in DC mode ( $ISO_{DC,mod,meas}$  and  $Stan_{DC,mod,meas}$  in Table 1). In this manner, the wear rates of the FE model and experiment were evaluated under identical contact kinematics.

160

### Wear and Creep Prediction Algorithm

Implant wear is known to depend on contact mechanics, but contact mechanics progressively change if the surface geometry is altered by wear or creep (Zhang et al., 2017). To ensure appropriate modelling of wear (Knight et al., 2007; Zhao et al., 2008), this interdependence was reproduced iteratively in our wear and creep prediction algorithm (named “WearPy”), a custom Python code that directly interacts with Abaqus (Figure 3).

165

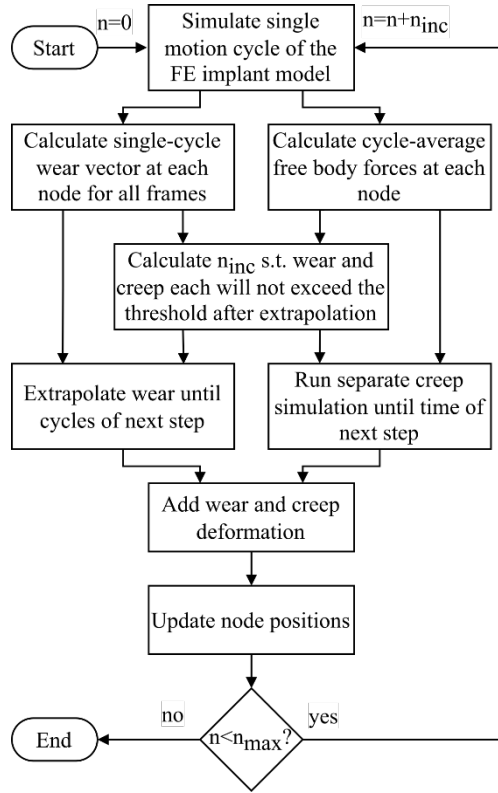

170 Figure 3. Flowchart of the “WearPy” implant wear and creep prediction pipeline. Here,  $n$  represents the current number of cycles in the analysis, which is iterative with steps of fewer cycles  $n_{inc}$  and stops when the maximum number of cycles  $n_{max}$  is reached.

175 WearPy divides the total number of cycles  $n_{max}$  (5 MC here) into steps of fewer cycles  $n_{inc}$ . Each step consists of the solution of the FE model described above for a single motion cycle, the calculation of wear and surface loads from the results, and the extrapolation of the wear and simulation of the creep over  $n_{inc}$  cycles until the next step. The removal of material due to wear and the deformation due to creep are modeled by updating the surface nodal positions. A preliminary convergence study on a pin-on-disk model showed that a change in surface geometry of up to 0.01 mm would not significantly change the contact mechanics. Thus, to ensure a smooth progression of surface deformation (Zhao et al., 2008), WearPy automatically chose the largest possible number of cycles per step ( $n_{inc}$ ) such that the larger of wear and creep caused surface deformations of exactly 0.01 mm and the smaller of wear and creep consequently caused <0.01 mm of deformation. After calculating a step wear and creep for the chosen number of cycles, the inlay mesh was updated, and the whole procedure was repeated until  $n_{max}=5$  MC was reached.

### 185 Wear model

To model the critical influence of cross-shear and contact-pressure on wear (Baykal et al., 2014), the local wear depth  $\delta$  at each node was calculated using a modified version of Archard’s Law:

$$\delta = k(CS, CP) \times CP \times \Delta x$$

190 Here,  $\Delta x$  is the sliding distance, and  $k(CS, CP)$ , measured in  $\text{mm}^3\text{N}^{-1}\text{m}^{-1}$ , is the wear factor as a function of cross-shear ratio  $CS$  as calculated by Goreham-Voss et al. (2010) and contact-pressure  $CP$ . The wear factor  $k(CS, CP)$  was defined as:

$$k(CS, CP) = 10^{-6} \times \left( 0.0202 + 0.888 \times \left( 1 - \exp(-50.9 \times CS) \right) \right) \times CP^{-0.649}$$

This empirical expression was derived from comprehensive pin-on-disk wear tests performed on the same PE material from which the inlays in this study are made (Dreyer et al., 2022a).

## 195 Creep model

To improve the accuracy of the contact-pressure dependent wear model, it is necessary to include surface deformations due to creep in the model (Quinci et al., 2014). Thus, a model for dynamic compressive creep of PE from the literature (Lee et al., 2003) was adapted, assuming 50% of creep deformation would be recovered (Lee and Pienkowski, 1998) during the test interruptions to measure gravimetric wear as well as after the test. The formula to calculate the creep strain  $\epsilon_{\text{creep}}$  based on the von-Mises stress  $\sigma_{\text{VM}}$  and the time in minutes,  $t_{\text{minutes}}$ , was defined as:

$$\epsilon_{\text{creep}} = (2.076 \times 10^{-3} + 3.897 \times 10^{-4} \times (\log_{10}(t_{\text{minutes}}) - 4)) \times \frac{\sigma_{\text{VM}}}{0.55} \times 0.5$$

This equation was implemented into the Abaqus “CREEP” user-subroutine. As part of the wear prediction algorithm, a separate creep analysis was automatically performed to determine the geometrical changes that occur over the number of cycles  $n_{\text{inc}}$  between two steps. During this creep analysis, the average over time of all the free-body-forces from contact and boundary conditions acting on each node of the inlay during the motion cycle was extracted from the solution of the FE model described above and then, in a separate creep simulation, applied as a static load to each node of the inlay. Thus, creep deformation was calculated for the whole inlay. To our knowledge, this is the first study to consider creep of a whole knee implant component, as other studies only modelled creep in a local contact area (Abdelgaied et al., 2011; Fregly et al., 2005; Willing and Kim, 2009; Zhao et al., 2008).

## Verification and Validation

To assess the credibility of the modelling approach and WearPy, verification and validation was performed according to ASME V&V 40-2018 (ASME, 2018) and regulatory (FDA, 2021) guidelines (see supplementary material). To this end, the validation included a comparison of the FE models and the experimental test comparator for the ISO and Stan conditions. A hypothetical context of use was defined, where the wear would be predicted during development of a new knee implant to identify the worst-case configuration for experimental wear testing. Finally, each of the credibility factors was independently assessed relative to the model risk associated with using the model here to support comparative evaluation of TKA designs.

## 3. Results

Three different sets of results were obtained: First the knee simulator test, second the corresponding FE models with the same input data, and third the FE models with kinematics input that was directly measured in the knee simulator test. For each of the three sets, Stan’s in vivo condition and for the standard ISO condition are reported.

### Joint loads and kinematics

#### Stan BC vs. ISO BC

Comparing the outputs, the test and models with Stan’s BCs exhibited higher peak axial forces (~3187 N vs. ~2600 N) and peak external moments (9.6 to 20.5 Nm vs. 1.9 to 7.1 Nm) than with the ISO BCs (Figure 4). For the kinematics, however, Stan’s BCs resulted in lower peak flexion angles (~49° vs ~58°), tibial internal rotation angles (~3.9° vs. 7.5° to 10.3°), and tibial anterior translation (0.6 to 0.7 mm vs. 4.1 to 5.5 mm) than the ISO BCs.

#### ISO BC: Experiment vs. model

For the  $\text{ISO}_{\text{FC,exp,nom}}$  test and  $\text{ISO}_{\text{FC,mod,nom}}$  model with the same inputs, there was no more than 23 N difference in peak output AP force and 1 Nm in IE moment (Figure 4). The kinematics peaks, however, deviated by up to 1.4 mm in the AP and up to 2.9° in the IE directions, especially during swing phase. Moreover, in the  $\text{ISO}_{\text{FC,exp,nom}}$  test, the peak internal rotation and anterior translation values varied by up to 2.5° and 1 mm over the course of the test. When the test’s experimentally measured kinematics were applied to the  $\text{ISO}_{\text{DC,mod,meas}}$  model, tibial loads differed from the FC ISO standard input loads.



Specifically, AP contact forces acted only posteriorly and exceeded 500 N, compared to 230 N in the anterior and 130 N in the posterior directions for the  $ISO_{FC,exp,nom}$  test and  $ISO_{FC,mod,nom}$  model with nominal ISO inputs. External moments of the  $ISO_{DC,mod,meas}$  model were low, however, at only 1.9 Nm compared to 7.1 Nm in the wear test.

245 **Stan BC: Experiment vs. model**

For the Stan DC test and two FE models, the output kinematics were in close agreement with differences in peak AP translation and internal rotation of less than 0.2 mm and  $0.1^\circ$ . In contrast, load deviations between the experiment and the DC models were observed. Mostly anterior tibial forces of up to 93.5 N were observed experimentally, while both the  $Stan_{DC,mod,nom}$  and  $Stan_{DC,mod,meas}$  models predicted mostly posterior forces of up to 408 N and 461 N, respectively (Figure 4). Again, the modelled external moments of up to 12.2 Nm were lower compared to up to 20.4 Nm measured in the wear test. Moreover, in the  $Stan_{DC,exp,nom}$  test, the peak internal moments and anterior forces varied by up to 8 Nm and 200 N over the course of the test.

250

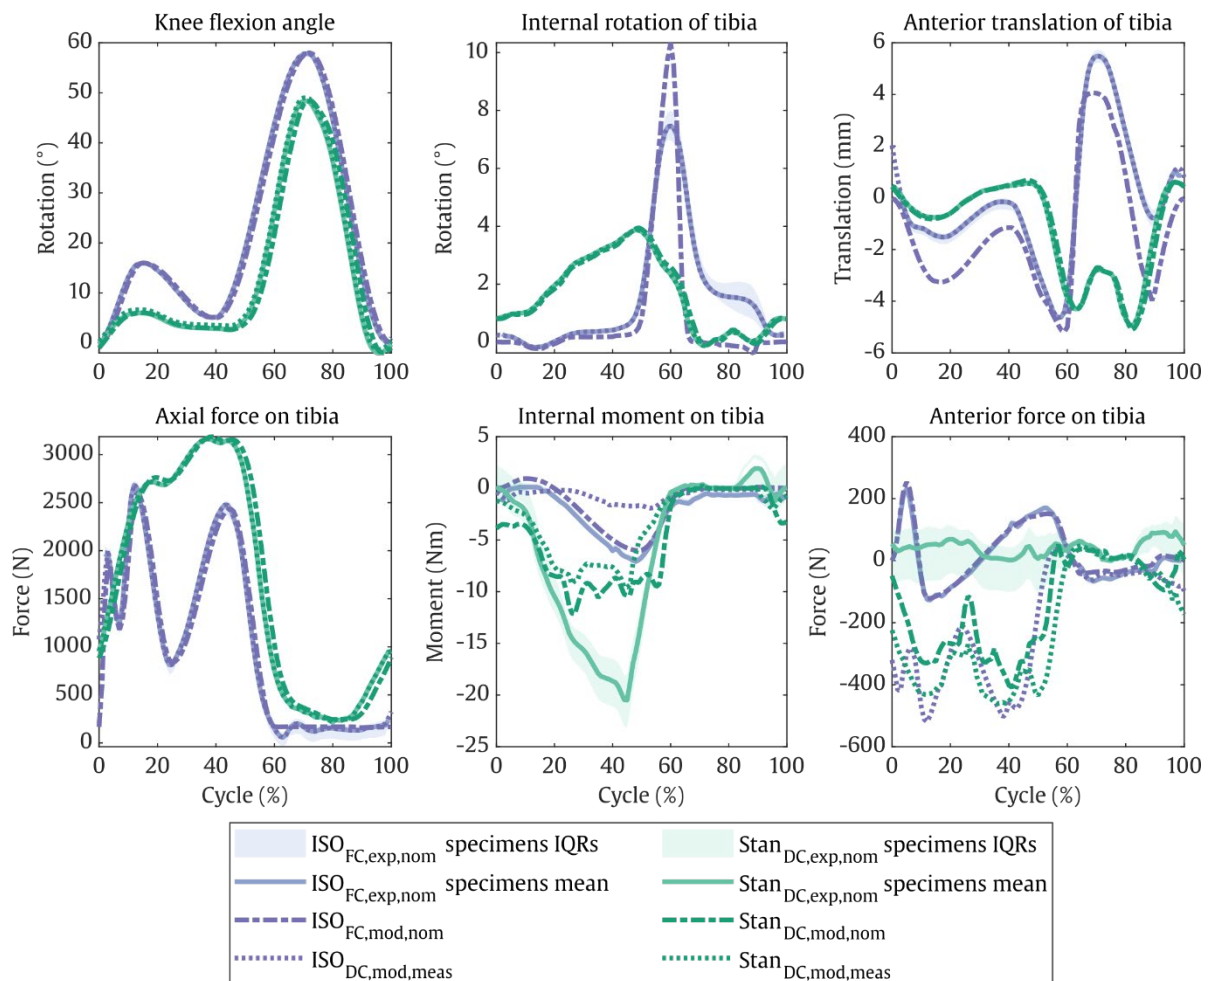

255 **Figure 4.** Resulting joint loads and kinematics measured for the specimens on the simulator (mean over all test intervals and specimens and interquartile ranges (IQRs) of each specimen), simulated using finite-element analysis with the same inputs ( $ISO_{FC,exp,nom}$  and  $Stan_{DC,exp,nom}$ ), and simulated using the experimentally measured kinematics as input to the FE model ( $ISO_{DC,exp,meas}$  and  $Stan_{DC,exp}$ ). Forces and moments are expressed as external loads acting on the articulating surface of the tibial inlay.

260

## Wear

The experimentally measured linear volumetric wear rate from 0.5–5.0 MC was 1.3–1.9 mm<sup>3</sup>/MC for the ISO<sub>FC,exp,nom</sub> group and a more than two-and-a-half times higher 3.5–4.9 mm<sup>3</sup>/MC for the Stan<sub>DC,exp,nom</sub> group (Figure 5). The Stan<sub>DC,mod,nom</sub> model predicted a wear rate of 4.3 mm<sup>3</sup>/MC, falling well within the experimental range for these BCs. This was not the case for the ISO<sub>FC,mod,nom</sub> model, which predicted a wear rate of 4.8 mm<sup>3</sup>/MC, being about three times higher than the corresponding experimentally obtained values. In contrast, both the ISO<sub>DC,mod,meas</sub> and Stan<sub>DC,mod,meas</sub> models driven by the experimental kinematics predicted wear rates that fell within the experimental ranges at 1.6 and 3.5 mm<sup>3</sup>/MC, respectively (Figure 5).

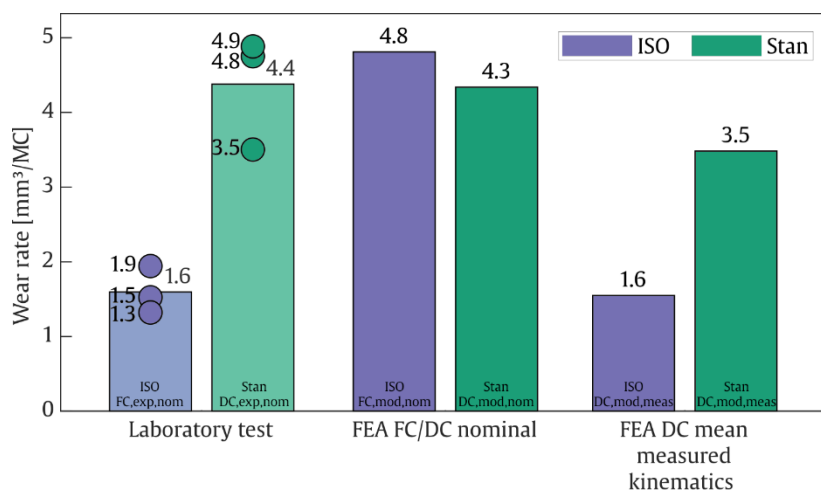

270

Figure 5. Wear rates measured for the specimens on the simulator (Laboratory test), simulated using finite-element analysis with the same inputs (FEA FC/DC nominal), and simulated using the experimentally measured kinematics as inputs to the FE model (FEA DC mean measured kinematics).

## Surface Deformation

The ISO<sub>FC,exp,nom</sub> test induced clear surface deformation to the medial and posterior facets of the inlay, even though the overall wear rate was lower than for Stan<sub>DC,exp,nom</sub> (Figure 6). The ISO<sub>DC,mod,meas</sub> model with the same kinematics showed similarly posterior surface deformation, while the ISO<sub>FC,mod,nom</sub> model showed posterolateral and anteromedial surface deformation. For the DC Stan condition, there was posterolateral and posterolateral surface deformation in the laboratory test and both models. Overall, the combined surface deformation induced by wear and creep in the FE simulations showed qualitative visual agreement with the 3D scan measurements on the corresponding physical test specimens.

280

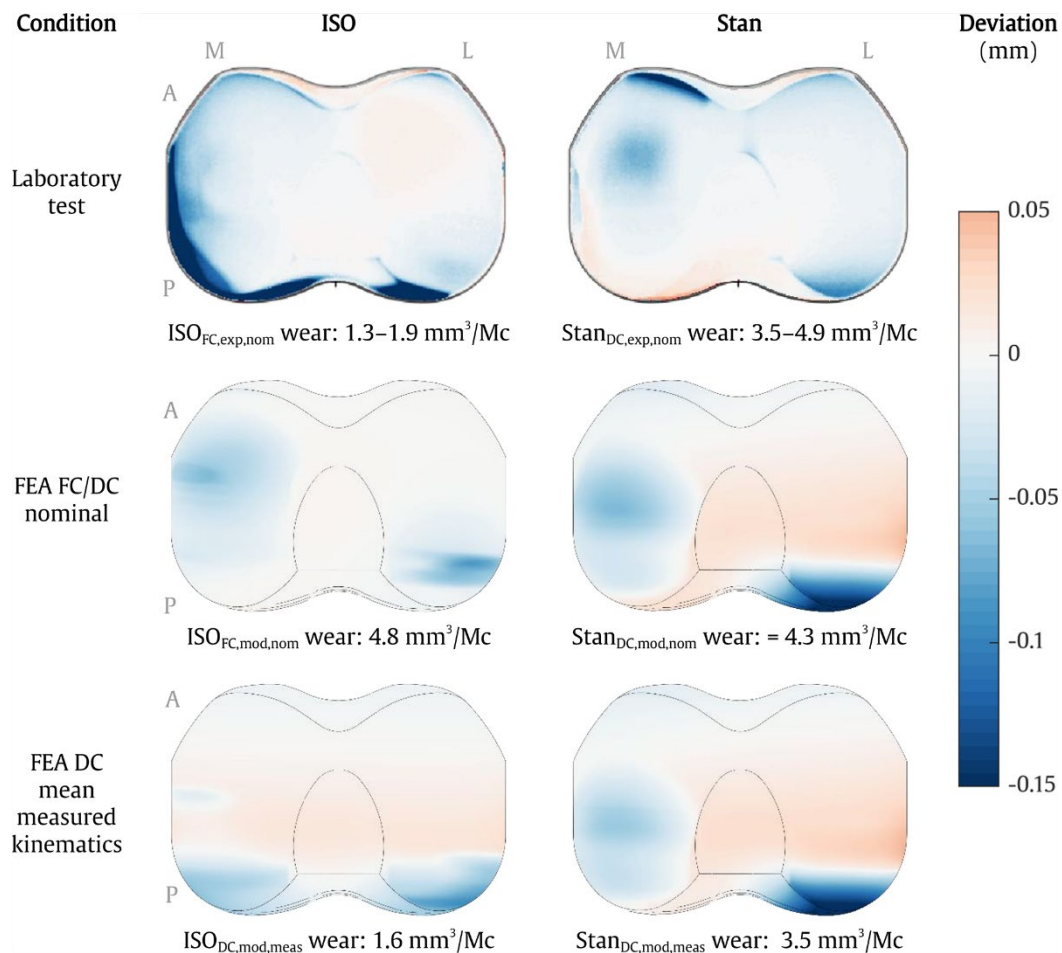

285 Figure 6. Surface deviation in the axial direction caused by wear and creep after 5 MC for the four models and  
the test specimens. Each test specimen plot represents the mean deviation of the three corresponding  
specimens.

### Verification and Validation

290 The credibility of the verification and validation activities was evaluated in accordance with  
standardized (ASME, 2018) and regulatory (FDA, 2021) guidance on model credibility (see  
supplementary material). Implementation of the scheme from the FDA guidance had practical  
challenges associated with mapping the proposed five-level gradation scheme for risk (the x-axis in  
Supplementary Figure S1) to credibility factors that have either three or four gradations (the y-axis).  
295 Nevertheless, the resulting evaluation provided a visual and easily interpretable overview of the  
credibility of the model. The conclusion from this assessment was that the modeling approach here is  
credible for use in support of low to medium model risk applications.

## 4. Discussion

300 Laboratory based testing of knee implant wear based on the currently established ISO boundary  
conditions is expensive and time consuming. Therefore, laboratory wear testing is rarely feasible for  
larger scale investigations into the effect of implant design, patient or surgical factors, or activity on  
implant wear. In an effort to address this challenge, the efficacy of FE simulation coupled with  
advanced PE wear and creep models as an alternative method of wear quantification was  
demonstrated here. Systematic model verification and validation was carried out, and the first  
comparison of the recently published standardized tibiofemoral implant loads and kinematics (“Stan”,  
305 Dreyer et al., 2022b) against the ISO boundary condition was performed. To our knowledge, this is  
also the first study investigating wear of the Innex knee implant by means of laboratory testing or

computational modelling, hence providing quantitative evidence supporting the widely used CAMS-Knee datasets (Taylor et al., 2017).

310 The main finding was that Stan's loads and kinematics resulted in higher wear rates and different surface deformation patterns compared to the ISO FC standard. Moreover, the FE wear model was able to accurately predict experimentally obtained wear, but was shown to be sensitive to inaccurate calculation of the joint kinematics. The experimental wear rates of 1.3–1.9 mm<sup>3</sup>/MC for the ISO<sub>FC,exp,nom</sub> test and 3.5–4.9 mm<sup>3</sup>/MC for the Stan<sub>DC,exp,nom</sub> test were lower than expected, however, compared to 5–40 mm<sup>3</sup>/MC for various other knee implant models with inlays made from conventional non highly crosslinked PE (Okazaki et al., 2019). The wear occurring more anteriorly on the medial than on the lateral condyle is consistent with earlier investigations of tibiofemoral contact locations for the CAMS-Knee data on the same implant model (Trepczynski et al., 2019) and of wear for similar in vivo data on another implant design (Wang et al., 2019).

320 The low wear rate of the ISO<sub>FC,exp,nom</sub> experiment can be explained by the contact occurring mainly on the posterior inlay edge. This is evident from the visible deformation for both the ISO<sub>DC,mod,meas</sub> model and the 3D scans (Figure 6). The posterior contact led to a small contact area, resulting in little overall implant wear. In comparison, the ISO<sub>FC,mod,nom</sub> model with nominal inputs predicted contact to occur roughly 2 mm more anteriorly on the inlay (Figure 4, top right). This resulted in a larger contact area (Figure 6, middle left), more relative sliding and less rolling, and almost three times more wear (Figure 325 5), as a larger contact area can increase wear even with the same load applied (Abdelgaied et al., 2018; Kang et al., 2009; Saikko, 2006). The large wear rate mismatch between the ISO<sub>FC,mod,nom</sub> model and the corresponding ISO<sub>FC,exp,nom</sub> experiment could therefore be due to limited representation of the simulator machine's inertial, friction, and control properties in the FC FE model, limiting its predictive capabilities with respect to joint kinematics. This is a common limitation of FC computational models (Abdelgaied et al., 2022; Bauer et al., 2021; Knight et al., 2007) and does not necessarily indicate poor modelling of the wear mechanism itself.

335 Wear was accurately predicted by our algorithm. The DC models driven by nominal (Stan<sub>DC,mod,nom</sub>) and measured (ISO<sub>DC,mod,meas</sub> and Stan<sub>DC,mod,meas</sub>) kinematics all predicted wear rates within the range of experimentally measured values. The experimental surface wear patterns were more spread out than the model predictions and showed edge deformations. This is likely due to the observed variability in kinematics over the course of the test and for the ISO<sub>DC,exp,nom</sub> due to an unwanted motion that occurred once after a test restart and deformed the inlay edges. However, the surface deformation patterns still qualitatively matched the three DC models. All this was achieved without tuning the models' underlying material data to the validation experiments in any way, rather the material data 340 was obtained from separate experiments. Wear volume and pattern were inaccurately predicted only for the ISO<sub>FC,mod,nom</sub> model, where the joint kinematics differed most compared to the experiment. This shows that knee implant wear can be predicted accurately if the underlying joint model is able to reliably reproduce the real-world joint contact mechanics, but may be inaccurate if not, highlighting the importance of exact in vivo measurements of joint kinematics for patient-specific models.

345 Specifically, accurate kinematics seem to be of higher importance for wear prediction than accurate loads. As discussed above, the ISO<sub>FC,mod,nom</sub> models' output kinematics deviated from the ones measured in the experiment by only a few mm/degrees but resulted in a threefold difference in wear rate. In contrast, the Stan<sub>DC,mod,nom</sub> model's loads deviated from the experiment by a factor of two for the internal moment and four for the anterior force, but still predicted wear rates accurately. The 350 relatively large axial force is likely the main load driver for wear, while transverse load errors in DC models are less consequential. Reinforcing this deduction, other studies have also shown that variations in the joint kinematics e.g. in AP and IE directions (McEwen et al., 2005) had a larger impact on wear predictions than changes in the applied AP and IE loads (Lin et al., 2010; Pal et al., 2008).

355 Applying the Stan kinematics and associated CAMS-HIGH100 loads resulted in almost three times  
more wear than applying the ISO FC boundary conditions. While this is the first wear simulation study  
using the recently published Stan dataset, others have applied in vivo loads collected earlier from  
some of the same subjects with instrumented implants in FC mode. The reported wear rates,  
compared to the ISO FC BCs, exhibited large variability, going from comparable (Wang et al., 2019),  
slightly higher (Shu et al., 2021), to up to three times higher (Reinders et al., 2015). However, such  
360 comparisons between test standards may not necessarily yield the same results for other implant  
designs (Abdelgaied et al., 2022), prohibiting a general interpretation of these results. Yet, while the  
body of evidence is still small, these and this study's results suggest that wear testing boundary  
conditions derived from in vivo measurements induce more wear than the standard ISO FC conditions.

365 A limitation of this study is that only one ultra-congruent implant design in one combination of  
component sizes and two sets of boundary conditions with different control methods were  
investigated. Further investigation of other implant designs and boundary conditions, e.g. the DC ISO  
standard and Stan's other activities of daily living, should be considered to more comprehensively  
investigate the effects of BCs derived from in vivo measurements on wear testing outcomes.  
Furthermore, the FE models presented here did not model the variability in component positioning,  
370 loads, kinematics, and geometry, which is unavoidable on a knee simulator, and thus did not account  
for rare extreme motions and their possible impact on surface deformations and wear rates. Only the  
articulating surface was considered and only abrasive wear was modelled. The size of the contact  
patches was not measured experimentally, so no validation of the modelled contact area, which may  
have influenced predicted wear rates, was possible. Lastly, the PE material density and creep model  
375 were not obtained for the specific PE material investigated here. Notwithstanding these limitations,  
the experimental wear rates were accurately reproduced by the FE models, which were based on  
independent prior studies of PE mechanical properties and wear.

We recommend that future computational wear simulation studies not only use in vivo kinematics,  
but also consider multiple activities of daily living (Reinders et al., 2015; Shu et al., 2021) and  
380 incorporate uncertainty in their evaluation to account for the sensitivity of wear models to variations  
in contact mechanics. This could be achieved using available standardized BCs (Abdel-Jaber et al.,  
2016; ASTM International, 2017b; Bergmann et al., 2014; Dreyer et al., 2022b) complemented with a  
sensitivity analysis (Pal et al., 2008) or by modelling wear using data of multiple patients and trials  
(Fregly et al., 2012; Taylor et al., 2017). To make these rich datasets accessible for preclinical  
385 evaluation of implant wear, e.g. for different implant designs and patient specific factors, the validated  
WearPy software is available upon request at <https://www.empa.ch/web/s304/wearpy>.

## Acknowledgements

We would like to thank Zimmer Biomet for providing access to the INNEX implant CAD files and PE  
material data, for providing material samples and implant components, and for running the physical  
390 test on the knee simulator.

## Declaration of Competing Interest

MJD, SHHN, BW, and WRT declare that they have no known competing financial interests or personal  
relationships that could have appeared to influence the work reported in this paper.

395 PF and FA are employed at Zimmer Biomet, the company producing the Innex implant investigated  
here.

## References

- Abdelgaied, A., Fisher, J., Jennings, L.M., 2022. Understanding the differences in wear testing method standards for total knee replacement. *J. Mech. Behav. Biomed. Mater.* 132, 105258. <https://doi.org/10.1016/j.jmbbm.2022.105258>
- 400 Abdelgaied, A., Fisher, J., Jennings, L.M., 2018. A comprehensive combined experimental and computational framework for pre-clinical wear simulation of total knee replacements. *J. Mech. Behav. Biomed. Mater.* 78, 282–291. <https://doi.org/10.1016/j.jmbbm.2017.11.022>
- Abdelgaied, A., Liu, F., Brockett, C., Jennings, L., Fisher, J., Jin, Z., 2011. Computational wear prediction of artificial knee joints based on a new wear law and formulation. *J. Biomech.* 44, 1108–1116. <https://doi.org/10.1016/j.jbiomech.2011.01.027>
- 405 Abdel-Jaber, S., Belvedere, C., Mattia, J.S.D., Leardini, A., Affatato, S., 2016. A new protocol for wear testing of total knee prostheses from real joint kinematic data: Towards a scenario of realistic simulations of daily living activities. *J. Biomech.* 49, 2925–2931. <https://doi.org/10.1016/j.jbiomech.2016.07.003>
- 410 ASME, 2018. ASME V&V 40-2018. Assessing Credibility of Computational Modeling through Verification and Validation: Application to Medical Devices (International standard). American Society of Mechanical Engineers, New York.
- ASTM International, 2017a. ASTM F732-17. Standard Test Method for Wear Testing of Polymeric Materials Used in Total Joint Prostheses (International standard). ASTM International, West Conshohocken. <https://doi.org/10.1520/F0732-17>
- 415 ASTM International, 2017b. ASTM F3141-17a. Standard Guide for Total Knee Replacement Loading Profiles (International standard). ASTM International, West Conshohocken. <https://doi.org/10.1520/F3141-17A>
- 420 Bauer, L., Kistler, M., Steinbrück, A., Ingr, K., Müller, P.E., Jansson, V., Schröder, C., Woiczinski, M., 2021. Different ISO Standards' Wear Kinematic Profiles Change the TKA Inlay Load. *Appl. Sci.* 11, 3161. <https://doi.org/10.3390/app11073161>
- Baykal, D., Siskey, R.S., Haider, H., Saikko, V., Ahlroos, T., Kurtz, S.M., 2014. Advances in tribological testing of artificial joint biomaterials using multidirectional pin-on-disk testers. *J. Mech. Behav. Biomed. Mater.* 31, 117–134.
- 425 Bergmann, G., Bender, A., Graichen, F., Dymke, J., Rohlmann, A., Trepczynski, A., Heller, M.O., Kutzner, I., 2014. Standardized Loads Acting in Knee Implants. *PLoS ONE* 9, e86035. <https://doi.org/10.1371/journal.pone.0086035>
- Carr, B.C., Goswami, T., 2009. Knee implants – Review of models and biomechanics. *Mater. Des.* 30, 398–413. <https://doi.org/10.1016/j.matdes.2008.03.032>
- 430 Dreyer, M.J., Taylor, W.R., Wasmer, K., Imwinkelried, T., Heuberger, R., Weisse, B., Crockett, R., 2022a. Anomalous Wear Behavior of UHMWPE During Sliding Against CoCrMo Under Varying Cross-Shear and Contact Pressure. *Tribol. Lett.* 70, 119. <https://doi.org/10.1007/s11249-022-01660-w>
- 435 Dreyer, M.J., Trepczynski, A., Hosseini Nasab, S.H., Kutzner, I., Schütz, P., Weisse, B., Dymke, J., Postolka, B., Moewis, P., Bergmann, G., Duda, G.N., Taylor, W.R., Damm, P., Smith, C.R., 2022b. European Society of Biomechanics S.M. Perren Award 2022: Standardized tibio-femoral implant loads and kinematics. *J. Biomech.* 141, 111171. <https://doi.org/10.1016/j.jbiomech.2022.111171>
- 440 FDA, 2021. Assessing the Credibility of Computational Modeling and Simulation in Medical Device Submissions - Draft Guidance for Industry and Food and Drug Administration Staff (Draft Guidance).
- Fregly, B.J., Besier, T.F., Lloyd, D.G., Delp, S.L., Banks, S.A., Pandy, M.G., D'Lima, D.D., 2012. Grand challenge competition to predict in vivo knee loads: GRAND CHALLENGE COMPETITION. *J. Orthop. Res.* 30, 503–513. <https://doi.org/10.1002/jor.22023>
- 445

- Fregly, B.J., Sawyer, W.G., Harman, M.K., Banks, S.A., 2005. Computational wear prediction of a total knee replacement from in vivo kinematics. *J. Biomech.* 38, 305–314. <https://doi.org/10.1016/j.jbiomech.2004.02.013>
- Godest, A.C., Beaugonin, M., Haug, E., Taylor, M., Gregson, P.J., 2002. Simulation of a knee joint replacement during a gait cycle using explicit finite element analysis. *J. Biomech.* 35, 267–275.
- 450 Goreham-Voss, C.M., Hyde, P.J., Hall, R.M., Fisher, J., Brown, T.D., 2010. Cross-shear implementation in sliding-distance-coupled finite element analysis of wear in metal-on-polyethylene total joint arthroplasty: Intervertebral total disc replacement as an illustrative application. *J. Biomech.* 43, 1674–1681. <https://doi.org/10.1016/j.jbiomech.2010.03.003>
- 455 Haider, H., 2009. Chapter 26 - Tribological Assessment of UHMWPE in the Knee, in: Kurtz, S.M. (Ed.), *UHMWPE Biomaterials Handbook (Second Edition)*. Academic Press, Boston, pp. 381–408. <https://doi.org/10.1016/B978-0-12-374721-1.00026-2>
- ISO, 2014. ISO 14243-3:2014. Implants for surgery - Wear of total knee-joint prostheses - Part 3: Loading and displacement parameters for wear-testing machines with displacement control and corresponding environmental conditions for test (International standard). ISO, Geneva.
- 460 ISO, 2009. ISO 14243-1:2009. Implants for surgery - Wear of total knee-joint prostheses - Part 1: Loading and displacement parameters for wear-testing machines with load control and corresponding environmental conditions for test (International standard). ISO, Geneva.
- Kang, L., Galvin, A.L., Fisher, J., Jin, Z., 2009. Enhanced computational prediction of polyethylene wear in hip joints by incorporating cross-shear and contact pressure in addition to load and sliding distance: Effect of head diameter. *J. Biomech.* 42, 912–918. <https://doi.org/10.1016/j.jbiomech.2009.01.005>
- 465 Kim, K.T., Lee, S., Ko, D.O., Seo, B.S., Jung, W.S., Chang, B.K., 2014. Causes of Failure after Total Knee Arthroplasty in Osteoarthritis Patients 55 Years of Age or Younger. *Knee Surg. Relat. Res.* 26, 13–19. <https://doi.org/10.5792/ksrr.2014.26.1.13>
- 470 Knight, L.A., Pal, S., Coleman, J.C., Bronson, F., Haider, H., Levine, D.L., Taylor, M., Rullkoetter, P.J., 2007. Comparison of long-term numerical and experimental total knee replacement wear during simulated gait loading. *J. Biomech.* 40, 1550–1558. <https://doi.org/10.1016/j.jbiomech.2006.07.027>
- 475 Kurtz, S.M., Lau, E., Ong, K., Zhao, K., Kelly, M., Bozic, K.J., 2009. Future Young Patient Demand for Primary and Revision Joint Replacement: National Projections from 2010 to 2030. *Clin. Orthop. Relat. Res.* 467, 2606–2612. <https://doi.org/10.1007/s11999-009-0834-6>
- Lee, K.-Y., Pienkowski, D., 1998. Viscoelastic Recovery of Creep-Deformed Ultra-High Molecular Weight Polyethylene (UHMWPE). *Charact. Prop. Ultra-High Mol. Weight Polyethyl.* 30–36. <https://doi.org/10.1520/STP11908S>
- 480 Lee, K.-Y., Pienkowski, D., Lee, S., 2003. Dynamic compressive creep of extruded ultra-high molecular weight polyethylene. *KSME Int. J.* 17, 1332–1338. <https://doi.org/10.1007/BF02982474>
- Lin, Y.-C., Haftka, R.T., Queipo, N.V., Fregly, B.J., 2010. Surrogate articular contact models for computationally efficient multibody dynamic simulations. *Med. Eng. Phys.* 32, 584–594. <https://doi.org/10.1016/j.medengphy.2010.02.008>
- 485 McEwen, H.M.J., Barnett, P.I., Bell, C.J., Farrar, R., Auger, D.D., Stone, M.H., Fisher, J., 2005. The influence of design, materials and kinematics on the in vitro wear of total knee replacements. *J. Biomech.* 38, 357–365. <https://doi.org/10.1016/j.jbiomech.2004.02.015>
- Mell, S.P., Fullam, S., Wimmer, M.A., Lundberg, H.J., 2018. Finite element evaluation of the newest ISO testing standard for polyethylene total knee replacement liners. *Proc. Inst. Mech. Eng. [H]* 232, 545–552. <https://doi.org/10.1177/0954411918770700>
- 490 O'Brien, S., Luo, Y., Wu, C., Petrak, M., Bohm, E., Brandt, J.-M., 2013. Computational development of a polyethylene wear model for the articular and backside surfaces in modular total knee replacements. *Tribol. Int.* 59, 284–291. <https://doi.org/10.1016/j.triboint.2012.03.020>
- 495 Okazaki, Y., Hosoba, M., Miura, S., Mochizuki, T., 2019. Effects of knee simulator control method and radiation dose on UHMWPE wear rate, and relationship between wear rate and clinical



- revision rate in National Joint Registry. *J. Mech. Behav. Biomed. Mater.* 90, 182–190. <https://doi.org/10.1016/j.jmbbm.2018.09.034>
- 500 Oparaugo, P.C., Clarke, I.C., Malchau, H., Herberts, P., 2001. Correlation of wear debris-induced osteolysis and revision with volumetric wear-rates of polyethylene: A survey of 8 reports in the literature. *Acta Orthop. Scand.* 72, 22–28. <https://doi.org/10.1080/000164701753606644>
- Pal, S., Haider, H., Laz, P.J., Knight, L.A., Rullkoetter, P.J., 2008. Probabilistic computational modeling of total knee replacement wear. *Wear* 264, 701–707. <https://doi.org/10.1016/j.wear.2007.06.010>
- 505 Pitta, M., Esposito, C.I., Li, Z., Lee, Y., Wright, T.M., Padgett, D.E., 2018. Failure After Modern Total Knee Arthroplasty: A Prospective Study of 18,065 Knees. *J. Arthroplasty* 33, 407–414. <https://doi.org/10.1016/j.arth.2017.09.041>
- Quinci, F., Dressler, M., Strickland, A.M., Limbert, G., 2014. Towards an accurate understanding of UHMWPE visco-dynamic behaviour for numerical modelling of implants. *J. Mech. Behav. Biomed. Mater.* 32, 62–75. <https://doi.org/10.1016/j.jmbbm.2013.12.023>
- 510 Reinders, J., Sonntag, R., Vot, L., Gibney, C., Nowack, M., Kretzer, J.P., 2015. Wear Testing of Moderate Activities of Daily Living Using In Vivo Measured Knee Joint Loading. *PLOS ONE* 10, e0123155. <https://doi.org/10.1371/journal.pone.0123155>
- Saikko, V., 2017. Effect of Contact Area on the Wear and Friction of UHMWPE in Circular Translation Pin-on-Disk Tests. *J. Tribol.* 139, 061606. <https://doi.org/10.1115/1.4036448>
- 515 Saikko, V., 2006. Effect of contact pressure on wear and friction of ultra-high molecular weight polyethylene in multidirectional sliding. *Proc. Inst. Mech. Eng. [H]* 220, 723–731. <https://doi.org/10.1243/09544119JEIM146>
- Shu, L., Hashimoto, S., Sugita, N., 2021. Enhanced In-Silico Polyethylene Wear Simulation of Total Knee Replacements During Daily Activities. *Ann. Biomed. Eng.* 49, 322–333. <https://doi.org/10.1007/s10439-020-02555-4>
- 520 Taylor, M., Prendergast, P.J., 2015. Four decades of finite element analysis of orthopaedic devices: Where are we now and what are the opportunities? *J. Biomech.* 48, 767–778. <https://doi.org/10.1016/j.jbiomech.2014.12.019>
- 525 Taylor, W.R., Schütz, P., Bergmann, G., List, R., Postolka, B., Hitz, M., Dymke, J., Damm, P., Duda, G., Gerber, H., Schwachmeyer, V., Hosseini Nasab, S.H., Trepczynski, A., Kutzner, I., 2017. A comprehensive assessment of the musculoskeletal system: The CAMS-Knee data set. *J. Biomech.* 65, 32–39. <https://doi.org/10.1016/j.jbiomech.2017.09.022>
- Trepczynski, A., Kutzner, I., Schütz, P., Dymke, J., List, R., von Roth, P., Moewis, P., Bergmann, G., 530 Taylor, W.R., Duda, G.N., 2019. Tibio-Femoral Contact Force Distribution is Not the Only Factor Governing Pivot Location after Total Knee Arthroplasty. *Sci. Rep.* 9, 182. <https://doi.org/10.1038/s41598-018-37189-z>
- Viceconti, M., Affatato, S., Baleani, M., Bordini, B., Cristofolini, L., Taddei, F., 2009. Pre-clinical validation of joint prostheses: A systematic approach. *J. Mech. Behav. Biomed. Mater.* 2, 120–127. <https://doi.org/10.1016/j.jmbbm.2008.02.005>
- 535 Wang, X.-H., Li, H., Dong, X., Zhao, F., Cheng, C.-K., 2019. Comparison of ISO 14243-1 to ASTM F3141 in terms of wearing of knee prostheses. *Clin. Biomech.* 63, 34–40. <https://doi.org/10.1016/j.clinbiomech.2019.02.008>
- 540 Willing, R., Kim, I.Y., 2009. A holistic numerical model to predict strain hardening and damage of UHMWPE under multiple total knee replacement kinematics and experimental validation. *J. Biomech.* 42, 2520–2527. <https://doi.org/10.1016/j.jbiomech.2009.07.008>
- Zhang, J., Chen, Z., Gao, Y., Zhang, X., Guo, L., Jin, Z., 2019. Computational Wear Prediction for Impact of Kinematics Boundary Conditions on Wear of Total Knee Replacement Using Two Cross-Shear Models. *J. Tribol.* 141, 111201. <https://doi.org/10.1115/1.4044377>
- 545 Zhang, J., Chen, Z., Wang, L., Li, D., Jin, Z., 2017. A patient-specific wear prediction framework for an artificial knee joint with coupled musculoskeletal multibody-dynamics and finite element analysis. *Tribol. Int.* 109, 382–389. <https://doi.org/10.1016/j.triboint.2016.10.050>



550 Zhao, D., Sakoda, H., Sawyer, W.G., Banks, S.A., Fregly, B.J., 2008. Predicting Knee Replacement Damage in a Simulator Machine Using a Computational Model With a Consistent Wear Factor. J. Biomech. Eng. 130, 011004. <https://doi.org/10.1115/1.2838030>
